# Supplementary material
Source: publisher figshare collection journal article supplement (https://sage.figshare.com/ndownloader/files/17430449)
Supplement: Supplementary file 1 [file 17430449]

Figure E1. Sample progress note auto-generated by the TEAMS CDSS tool

## Progress note

### TECHNOLOGY ENABLED ASTHMA MANAGEMENT SYSTEM (TEAMS)

#### Asthma telemedicine visit summary xx/xx/xxxx:

- Assessment: Very Poorly Controlled, likely Severe persistent asthma based on prescribed medications and symptom pattern.
- Prescribed: SYMBICORT 160-4.5 mcg ( Budesonide-Formoterol MDI ) at a MEDIUM dose (640 mcg daily) and is currently taking 2 puffs in the morning and 2 puffs at night (640 mcg daily - MEDIUM dose)
- Other asthma control medications: NONE (taking cetirizine for allergy)
- Recommended stepwise therapy is Step 5.
- The patient is currently taking Step 4 - Insufficient control medication
- Plan: Schedule office visit with PCP, Follow up virtual visit in 2 weeks

#### DETAILED NOTE BELOW

#### SUBJECTIVE

XXX was seen via Zoom (telemedicine) for nursing follow up of Asthma.

#### The patient reports the following:

|                                                                   |                                                                                                                                                  |
|-------------------------------------------------------------------|--------------------------------------------------------------------------------------------------------------------------------------------------|
| Daytime symptoms<br>Well controlled <= 2 x week                   | <b>Every day, throughout the day</b> (maybe 2-3x day, mostly morning or evening). Notes recurrent chest discomfort which resolves with albuterol |
| Night time wake up from asthma<br>Well controlled <= 2 x month    | <b>Wakes three nights a week</b>                                                                                                                 |
| Use of rescue inhaler for symptoms<br>Well controlled <= 2 x week | <b>Using inhaler many times a day</b>                                                                                                            |
| Activity limitations<br>Well controlled = none                    | <b>Some limitation</b>                                                                                                                           |

Patient perceived asthma control: **Very poorly controlled**

Current respiratory illness: Feels fine

Any smoking in the past 6 months: **Yes**

Any symptoms of life-threatening asthma: No

NOTES: noticing chest discomfort all day, a pain with deep breathing, pain resolved with taking albuterol and stays away for 3 to 4 hours then returns.

#### MEDICATION USE:

Prescribed: SYMBICORT 160-4.5 mcg ( Budesonide-Formoterol MDI ) and is currently taking 2 puffs in the morning and 2 puffs at night (MEDIUM dose)—fully adherent.

*Low dose is equal or less than 540mcg; High dose is greater than 1080mcg*

Taking any additional long acting beta agonist or leukotriene inhibitor: NONE (taking cetirizine for allergy)

Rescue medication: Albuterol inhaler - used about 4-5 times a day - takes prior to AM/PM Symbicort as recommended, and then a couple of times during the day

#### Most recent patient self-reported data (MyChart smartphone monitoring) shows:

|                                                           | 4/16/2019                  | 4/15/2019                  | 4/14/2019                  | 4/5/2019                   | 4/3/2019                   | 4/1/2019                   |
|-----------------------------------------------------------|----------------------------|----------------------------|----------------------------|----------------------------|----------------------------|----------------------------|
| Time                                                      | 6:00 AM                    | 7:01 AM                    | 9:22 AM                    | 7:52 AM                    | 5:44 AM                    | 2:23 PM                    |
| Did you have ANY SYMPTOMS of asthma in the past 24 hours? | I had SOME asthma symptoms |
| What was your PEAK FLOW                                   | 358                        | 357                        | 352                        | 401                        | 318                        | 533                        |

today?

## OBJECTIVE

Appears well - Normal effort with respiration

Peak flow today via digital PEF meter is 481 L/min, which is 100% of personal best (481)

FEV1 (today): 3.35 FEV1 Predicted: 4.15 • FEV1 % of predicted: 81

- FEV1 or PFM Zone: Green

## ASSESSMENT

No current safety concerns: Symptoms have decreased over all, but noticing regular chest discomfort - needs to follow up in office ASAP and may need stepwise increase to bring symptoms under control faster. Should follow up ASAP for chest pain.

### EPR-3 calculated asthma assessment:

Asthma control: Very poorly controlled

Asthma severity (EPR3): Severe persistent asthma

Guideline based assessment of controller therapy: Insufficient control medication

- Guideline recommended stepwise therapy: Step 5
- Provider prescribed stepwise therapy level: 4
- Patient using stepwise therapy level: 4
- Recommended ICS adjustments: Taking maximum dose prescribed by provider
- Recommended follow up: Follow up with PCP ASAP

Based on DHHS. National Heart Lung & Blood Institute. [Asthma Care Quick Reference: Diagnosing and Managing Asthma](#)

## PLAN

| Asthma Education covered this visit:          |                            |
|-----------------------------------------------|----------------------------|
| What is asthma + what causes symptoms         |                            |
| What happens when asthma is uncontrolled      | Demonstrates understanding |
| How do you know if your asthma is controlled? | Demonstrates understanding |
| Control vs. rescue medications                | Demonstrates understanding |
| Recognizing symptoms of asthma                | Demonstrates understanding |
| What to do during an asthma attack            | Demonstrates understanding |
| Life threatening asthma symptoms              | Demonstrates understanding |
| How to take inhalers correctly                | Demonstrates understanding |
| How and why you should use a spacer           | Demonstrates understanding |
| How to use a peak flow meter                  | Demonstrates understanding |
| Asthma triggers and how to handle them        | Demonstrates understanding |
| Managing exercise induced asthma              | Demonstrates understanding |
| Keeping track of symptoms                     |                            |
| Using an asthma action plan                   |                            |

Personal goals for asthma management: Wants to get rid of chest discomfort; Total minutes asthma education: 35

Follow up plan: Schedule office visit with PCP ASAP, Follow up virtual visit in 2 weeks. Reinforced need to follow up in office ASAP; given # to call clinic since he did not have it.
